# Supplementary material for: A three monoclonal antibody combination potently neutralizes multiple botulinum neurotoxin serotype F subtypes
Source: PubMed Central journal article supplement (PMC5360321; doi:10.1371/journal.pone.0174187), 2017-03-21
Supplement: pone.0174187.s004.pdf [file pone.0174187.s004.pdf]

**Supplementary Table 1. Characteristics of yeast display libraries used for BoNT/F mAb generation.**

| <b>Library name</b>                | <b>Initial immunogen</b>   | <b>Boosting immunogen</b> | <b>Library size</b> |
|------------------------------------|----------------------------|---------------------------|---------------------|
| Mouse BoNT/F1H <sub>C</sub>        | BoNT/F1 H <sub>C</sub>     | BoNT/F1 H <sub>C</sub>    | 7.6x10 <sup>7</sup> |
| Mouse BoNT/F1                      | BoNT/F1 H <sub>C</sub>     | BoNT/F1 toxin complex     | 9.0x10 <sup>7</sup> |
| Mouse BoNT/F3 LC-H <sub>N</sub>    | BoNT/F3 LC-H <sub>N</sub>  | BoNT/F3 LC-H <sub>N</sub> | 1.8x10 <sup>7</sup> |
| Mouse BoNT/F5 LC-H <sub>N</sub>    | BoNT/F5 LC-H <sub>N</sub>  | BoNT/F5 LC-H <sub>N</sub> | 2.0x10 <sup>7</sup> |
| Mouse BoNT/F6 LC-N <sub>N</sub>    | BoNT/F6 LC-H <sub>N</sub>  | BoNT/F6 LC-H <sub>N</sub> | 1.6x10 <sup>7</sup> |
| Mouse BoNT/F7 H <sub>C</sub>       | BoNT/F7 H <sub>C</sub>     | BoNT/F7 H <sub>C</sub>    | 3x10 <sup>7</sup>   |
| Mouse BoNT/F7Lc-H <sub>N</sub>     | BoNT/F7 LC-H <sub>N</sub>  | BoNT/F7 LC-H <sub>N</sub> | 4x10 <sup>7</sup>   |
| Human Donors 28, 29,<br>30 Mixture | Pentavalent BoNT<br>Toxoid | Pentavalent BoNT Toxoid   | 2x10 <sup>8</sup>   |
